# Supplementary material
Source: publisher site journal article supplement (http://kjim.org/upload/media/kjim-2019-358-suppl1.pdf)
Supplement: Supplementary file 1 [file kjim-2019-358-suppl1.pdf]

**Supplementary Table 1. Univariate and multivariate analyses of predictors of baseline lymphopenia (ALC < 1,000/ $\mu$ L, n = 1,222)**

| Variable                          | Baseline lymphopenia          |                      |                               |                      |
|-----------------------------------|-------------------------------|----------------------|-------------------------------|----------------------|
|                                   | Univariate analysis           |                      | Multivariate analysis         |                      |
|                                   | OR (95% CI)                   | p value              | OR (95% CI)                   | p value              |
| Age at diagnosis, /yr             | 1.02 (1.00–1.04)              | 0.118                |                               |                      |
| ECOG 2 (vs. ECOG 0–1)             | 2.99 (1.22–7.34)              | 0.017                | 1.96 (0.70–5.44)              | 0.199                |
| Stage II (vs. stage I)            | 1.45 (0.65–3.22)              | 0.362                | 1.43 (0.64–3.17)              | 0.386                |
| Stage III (vs. stage I)           | 4.04 (2.19–7.45) <sup>a</sup> | < 0.001 <sup>a</sup> | 3.81 (2.05–7.09) <sup>a</sup> | < 0.001 <sup>a</sup> |
| HER2 amplification (vs. negative) | 0.85 (0.26–2.81)              | 0.793                |                               |                      |

ALC, absolute lymphocyte count; OR, odds ratio; CI, confidence interval; ECOG, Eastern Cooperative Oncology Group; HER2, epidermal growth factor receptor 2.

<sup>a</sup>Statistically significant variables.
